# Supplementary material for: The combination of spectroscopy, microscopy, and profilometry methods for the physical and chemical characterization of environmentally relevant microplastics
Source: Royal Society of Chemistry journal article supplement (doi:10.1039/c8ay01826j), 2018-01-01
Supplement: c8ay01826j1.pdf [file c8ay01826j1.pdf]

## Supplemental Information

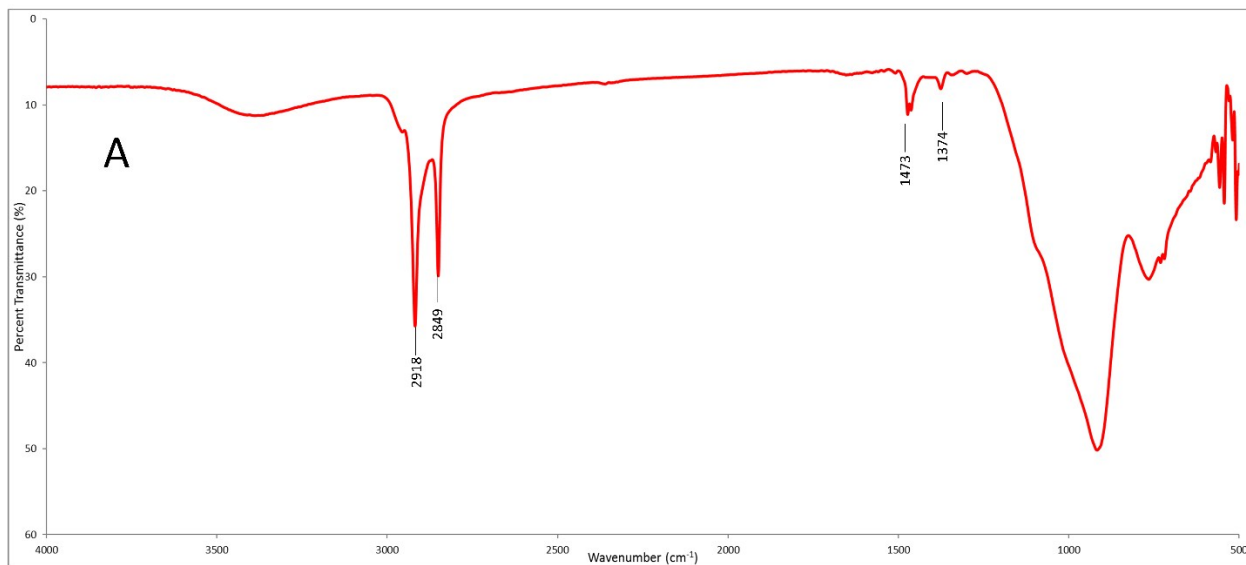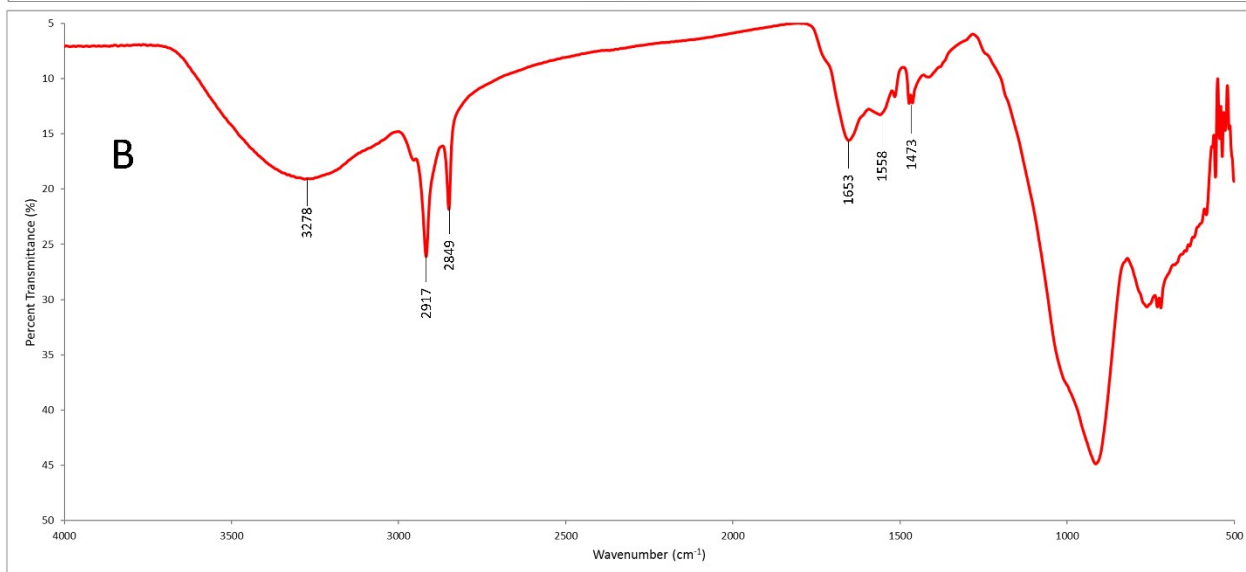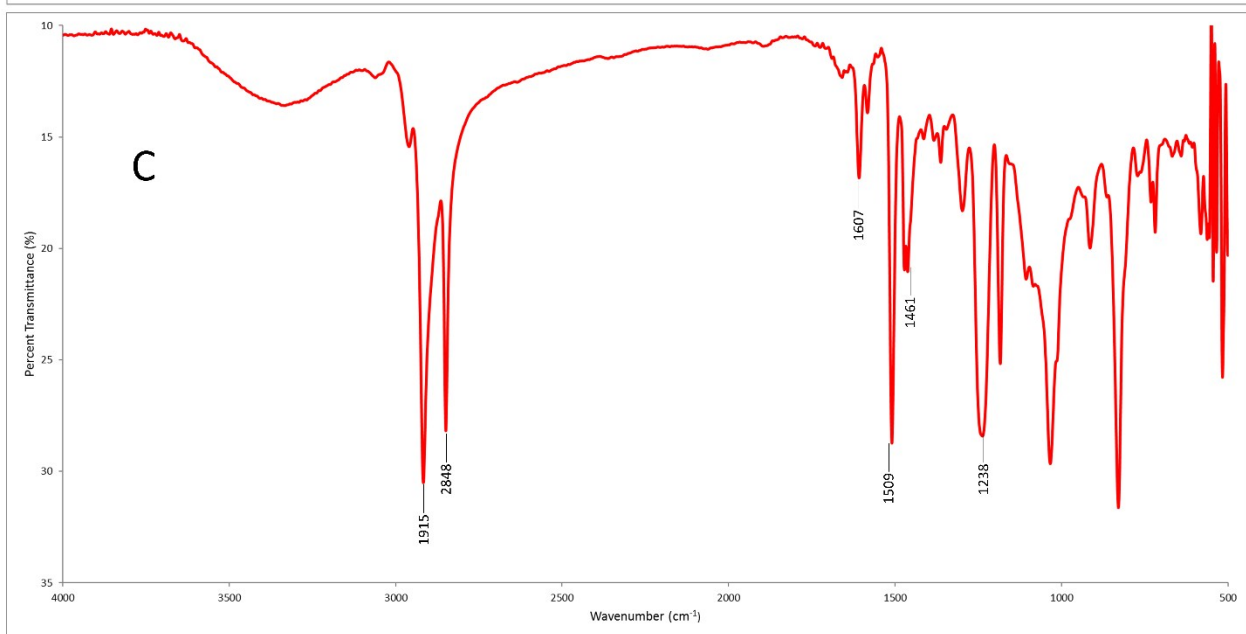

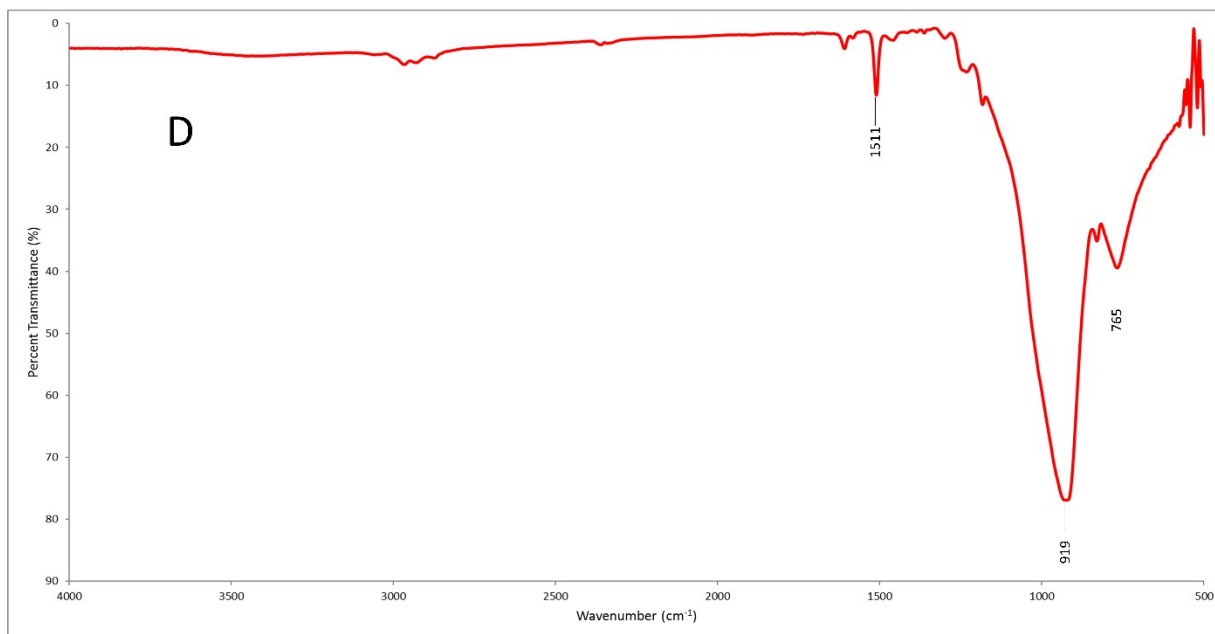

**Figure S1:** FTIR Microscope Spectra of WWTP Polyethylene Samples (A.) Sphere 01- Polyethylene (B.) Sphere 02- Plastic Polymer with OH group (C.) Sphere 04- Polyethylene (D.) Epoxy Adhesive. The wavenumber scale differs from figure 1 spectra as the samples were analyzed on different instruments.

| Particle Identity                | Sa (µm) | Sq (µm) | Sz (µm) | Diameter (µm) |
|----------------------------------|---------|---------|---------|---------------|
| Blue Microsphere Standard 1      | 0.207   | 0.269   | 2.970   | 117.95        |
| Blue Microsphere Standard 2      | 0.218   | 0.418   | 7.297   | 107.44        |
| Blue Microsphere Standard 3      | 0.115   | 0.222   | 3.449   | 106.58        |
| Blue Microsphere Standard 4      | 1.165   | 1.563   | 9.904   | 117.09        |
| Average of Blue Microspheres     | 0.426   | 0.618   | 5.905   | 112.27        |
| St. Dev. of Blue Microspheres    | 0.5     | 0.6     | 3.3     | 6.1           |
| Orange Microsphere Standard 1    | 1.697   | 2.294   | 25.641  | 458.73        |
| Orange Microsphere Standard 2    | 1.491   | 2.178   | 23.918  | 492.19        |
| Orange Microsphere Standard 3    | 2.401   | 3.001   | 42.055  | 472.61        |
| Orange Microsphere Standard 4    | 5.314   | 6.398   | 34.300  | 448.94        |
| Average of Orange Microspheres   | 2.726   | 3.468   | 31.479  | 468.12        |
| St. Dev. of Orange Microspheres  | 1.8     | 2.0     | 8.4     | 18.8          |
| Face Wash: Orange MP Bead 1      | 2.129   | 3.139   | 55.068  | 788.52        |
| Face Wash: Orange MP Bead 2      | 1.692   | 2.206   | 100.970 | 786.90        |
| Face Wash: Orange MP Bead 3      | 0.928   | 1.356   | 16.279  | 618.51        |
| Face Wash: Orange MP Bead 4      | 0.586   | 0.925   | 20.645  | 650.89        |
| Average of Orange Face Wash MPs  | 1.334   | 1.906   | 48.240  | 711.206       |
| St. Dev. of Orange Face Wash MPs | 0.7     | 1.0     | 39.2    | 89.3          |
| Face Wash: Yellow MP Bead 1      | 2.321   | 4.954   | 50.605  | 327.28        |
| Face Wash: Yellow MP Bead 2      | 3.058   | 4.708   | 37.231  | 388.53        |
| Face Wash: Yellow MP Bead 3      | 14.036  | 17.752  | 100.405 | 358.95        |
| Face Wash: Yellow MP Bead 4      | 2.481   | 3.685   | 37.679  | 426.89        |
| Average of Yellow Face Wash MPs  | 5.474   | 7.775   | 56.480  | 375.41        |
| St. Dev. of Yellow Face Wash MPs | 5.7     | 6.7     | 29.9    | 42.4          |

**Table S1:** Complete values for each MP sample tested on the OP.
